# Supplementary material
Source: ML conference proceedings conference paper supplement (https://openreview.net/forum?id=iWc0qE116u)

Sample Rollouts, seed=0

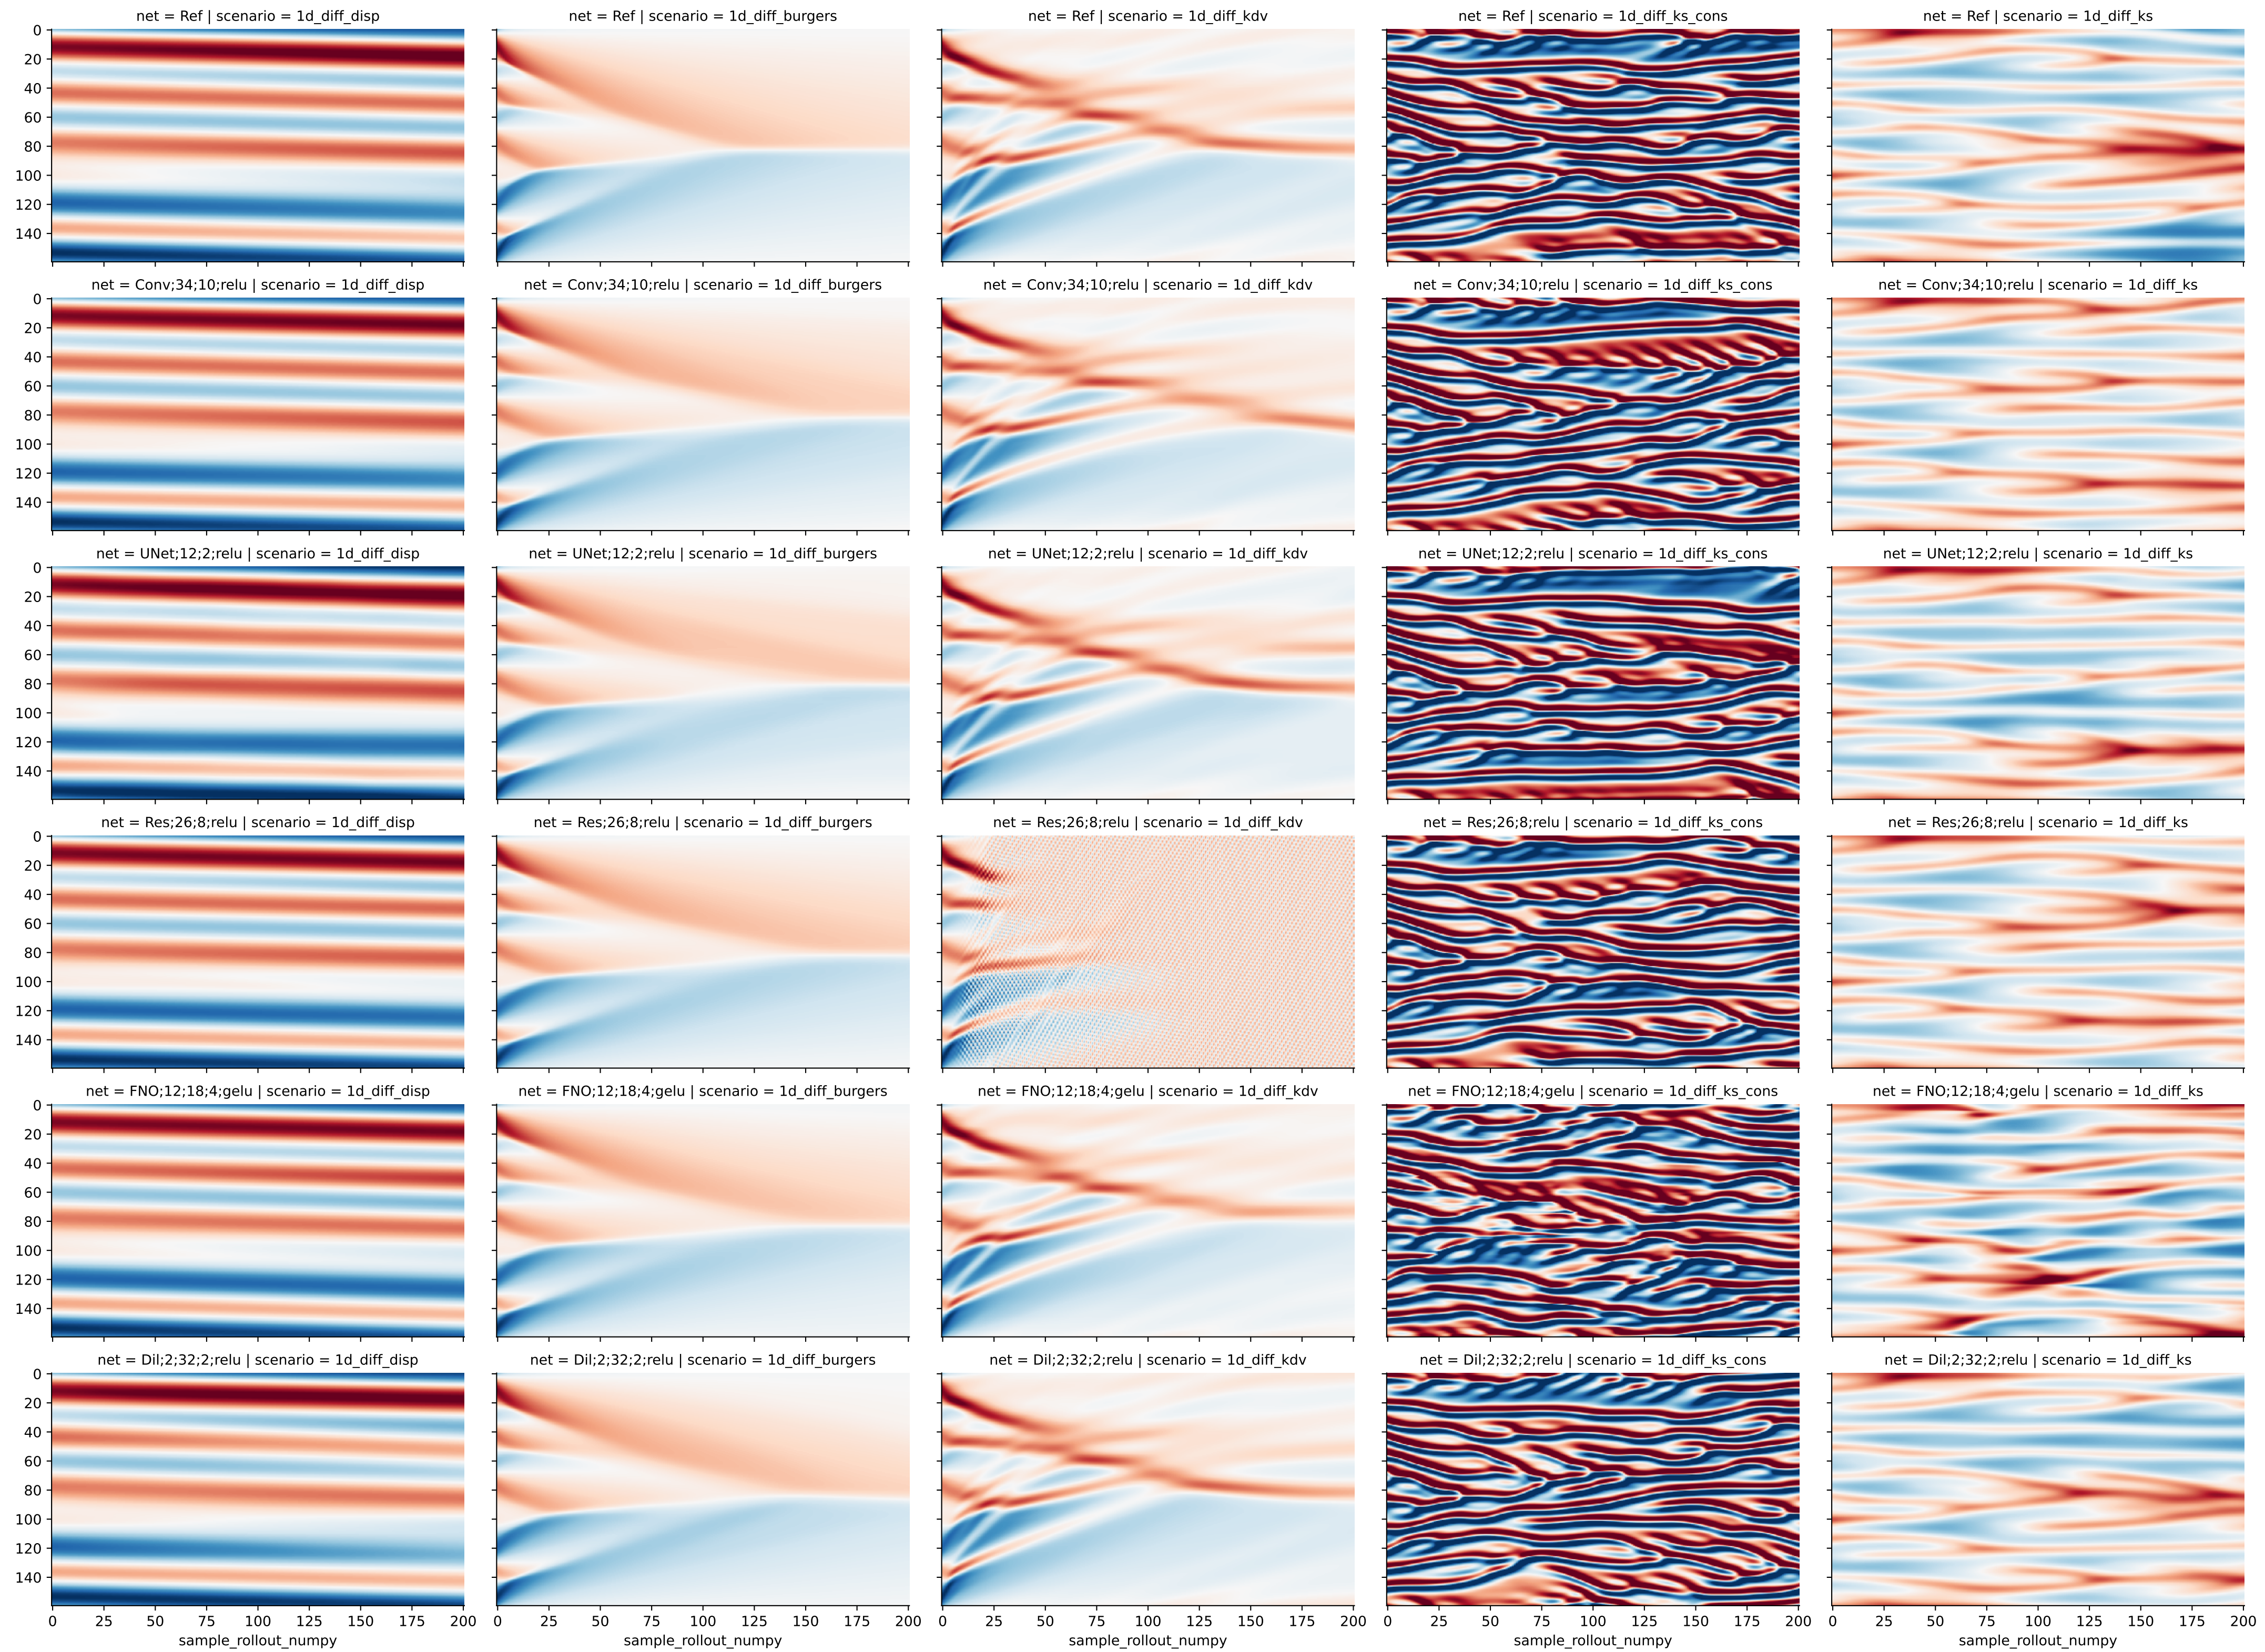

Supplement: supplementary_material [file attachment]

Sample Rollouts Abs-Diff, seed=0

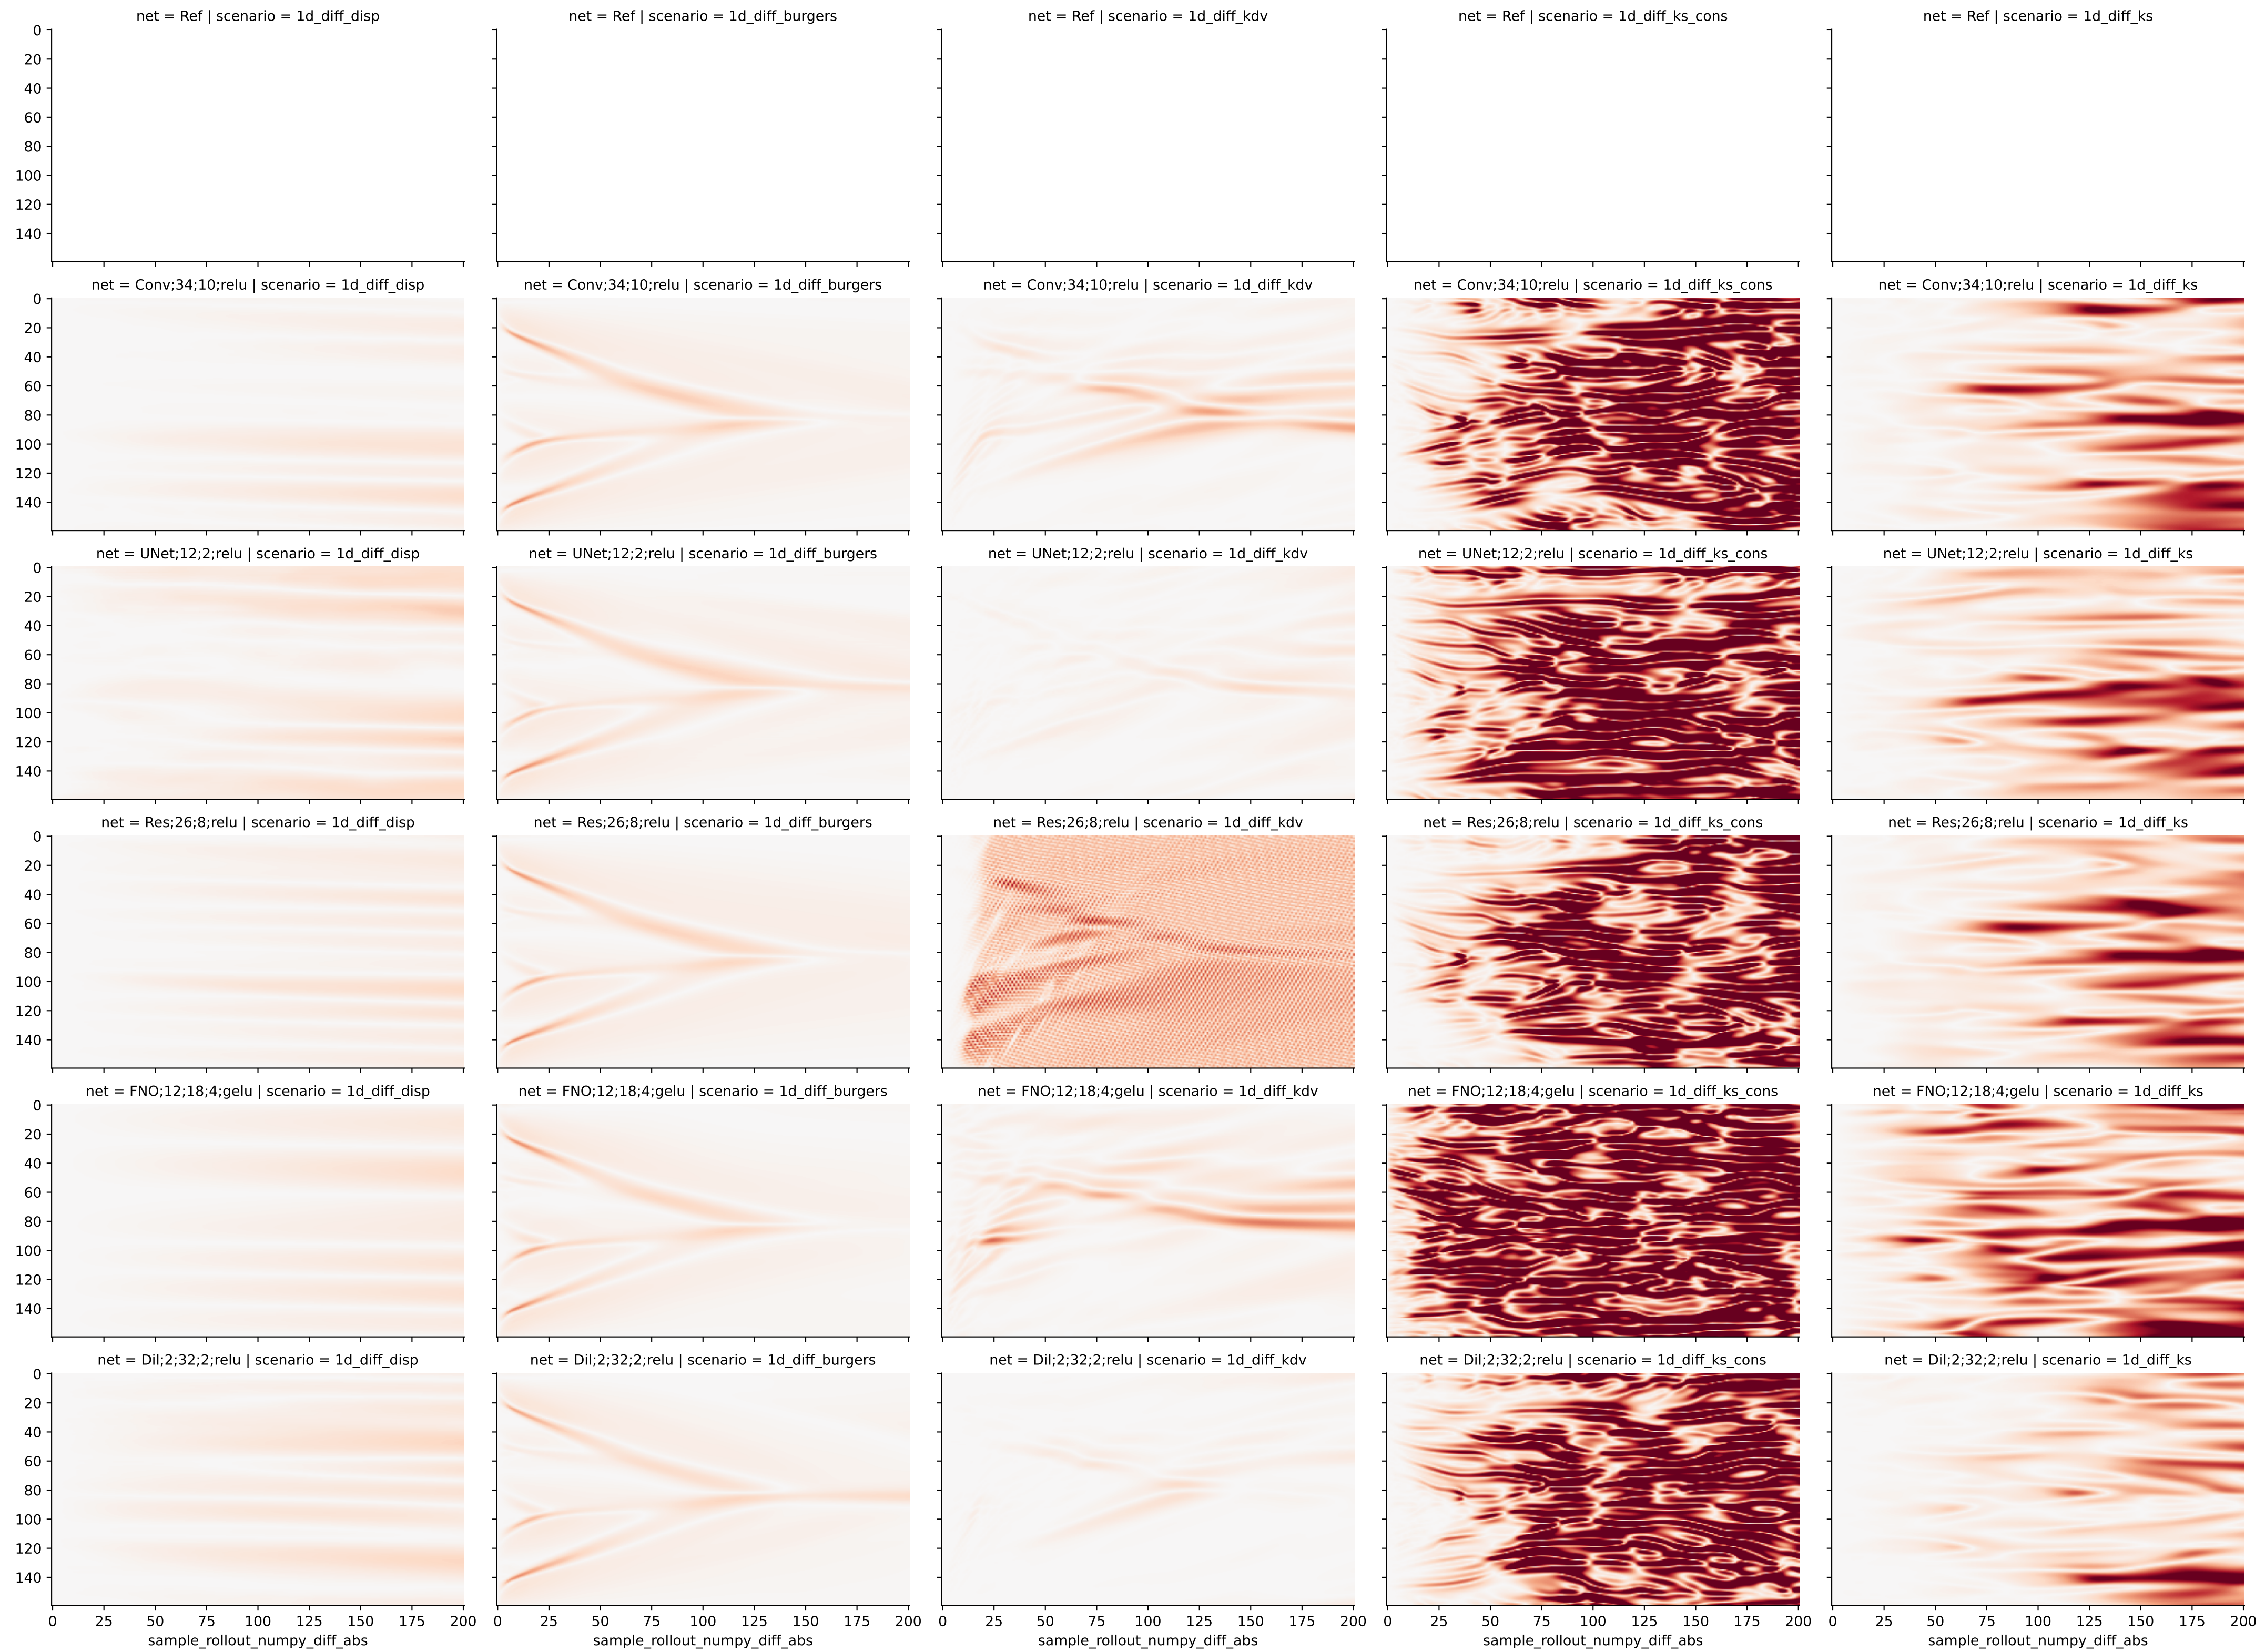

Supplement: supplementary_material [file attachment]

Sample Rollouts, 1d\_diff\_kdv, UNet;12;2;relu

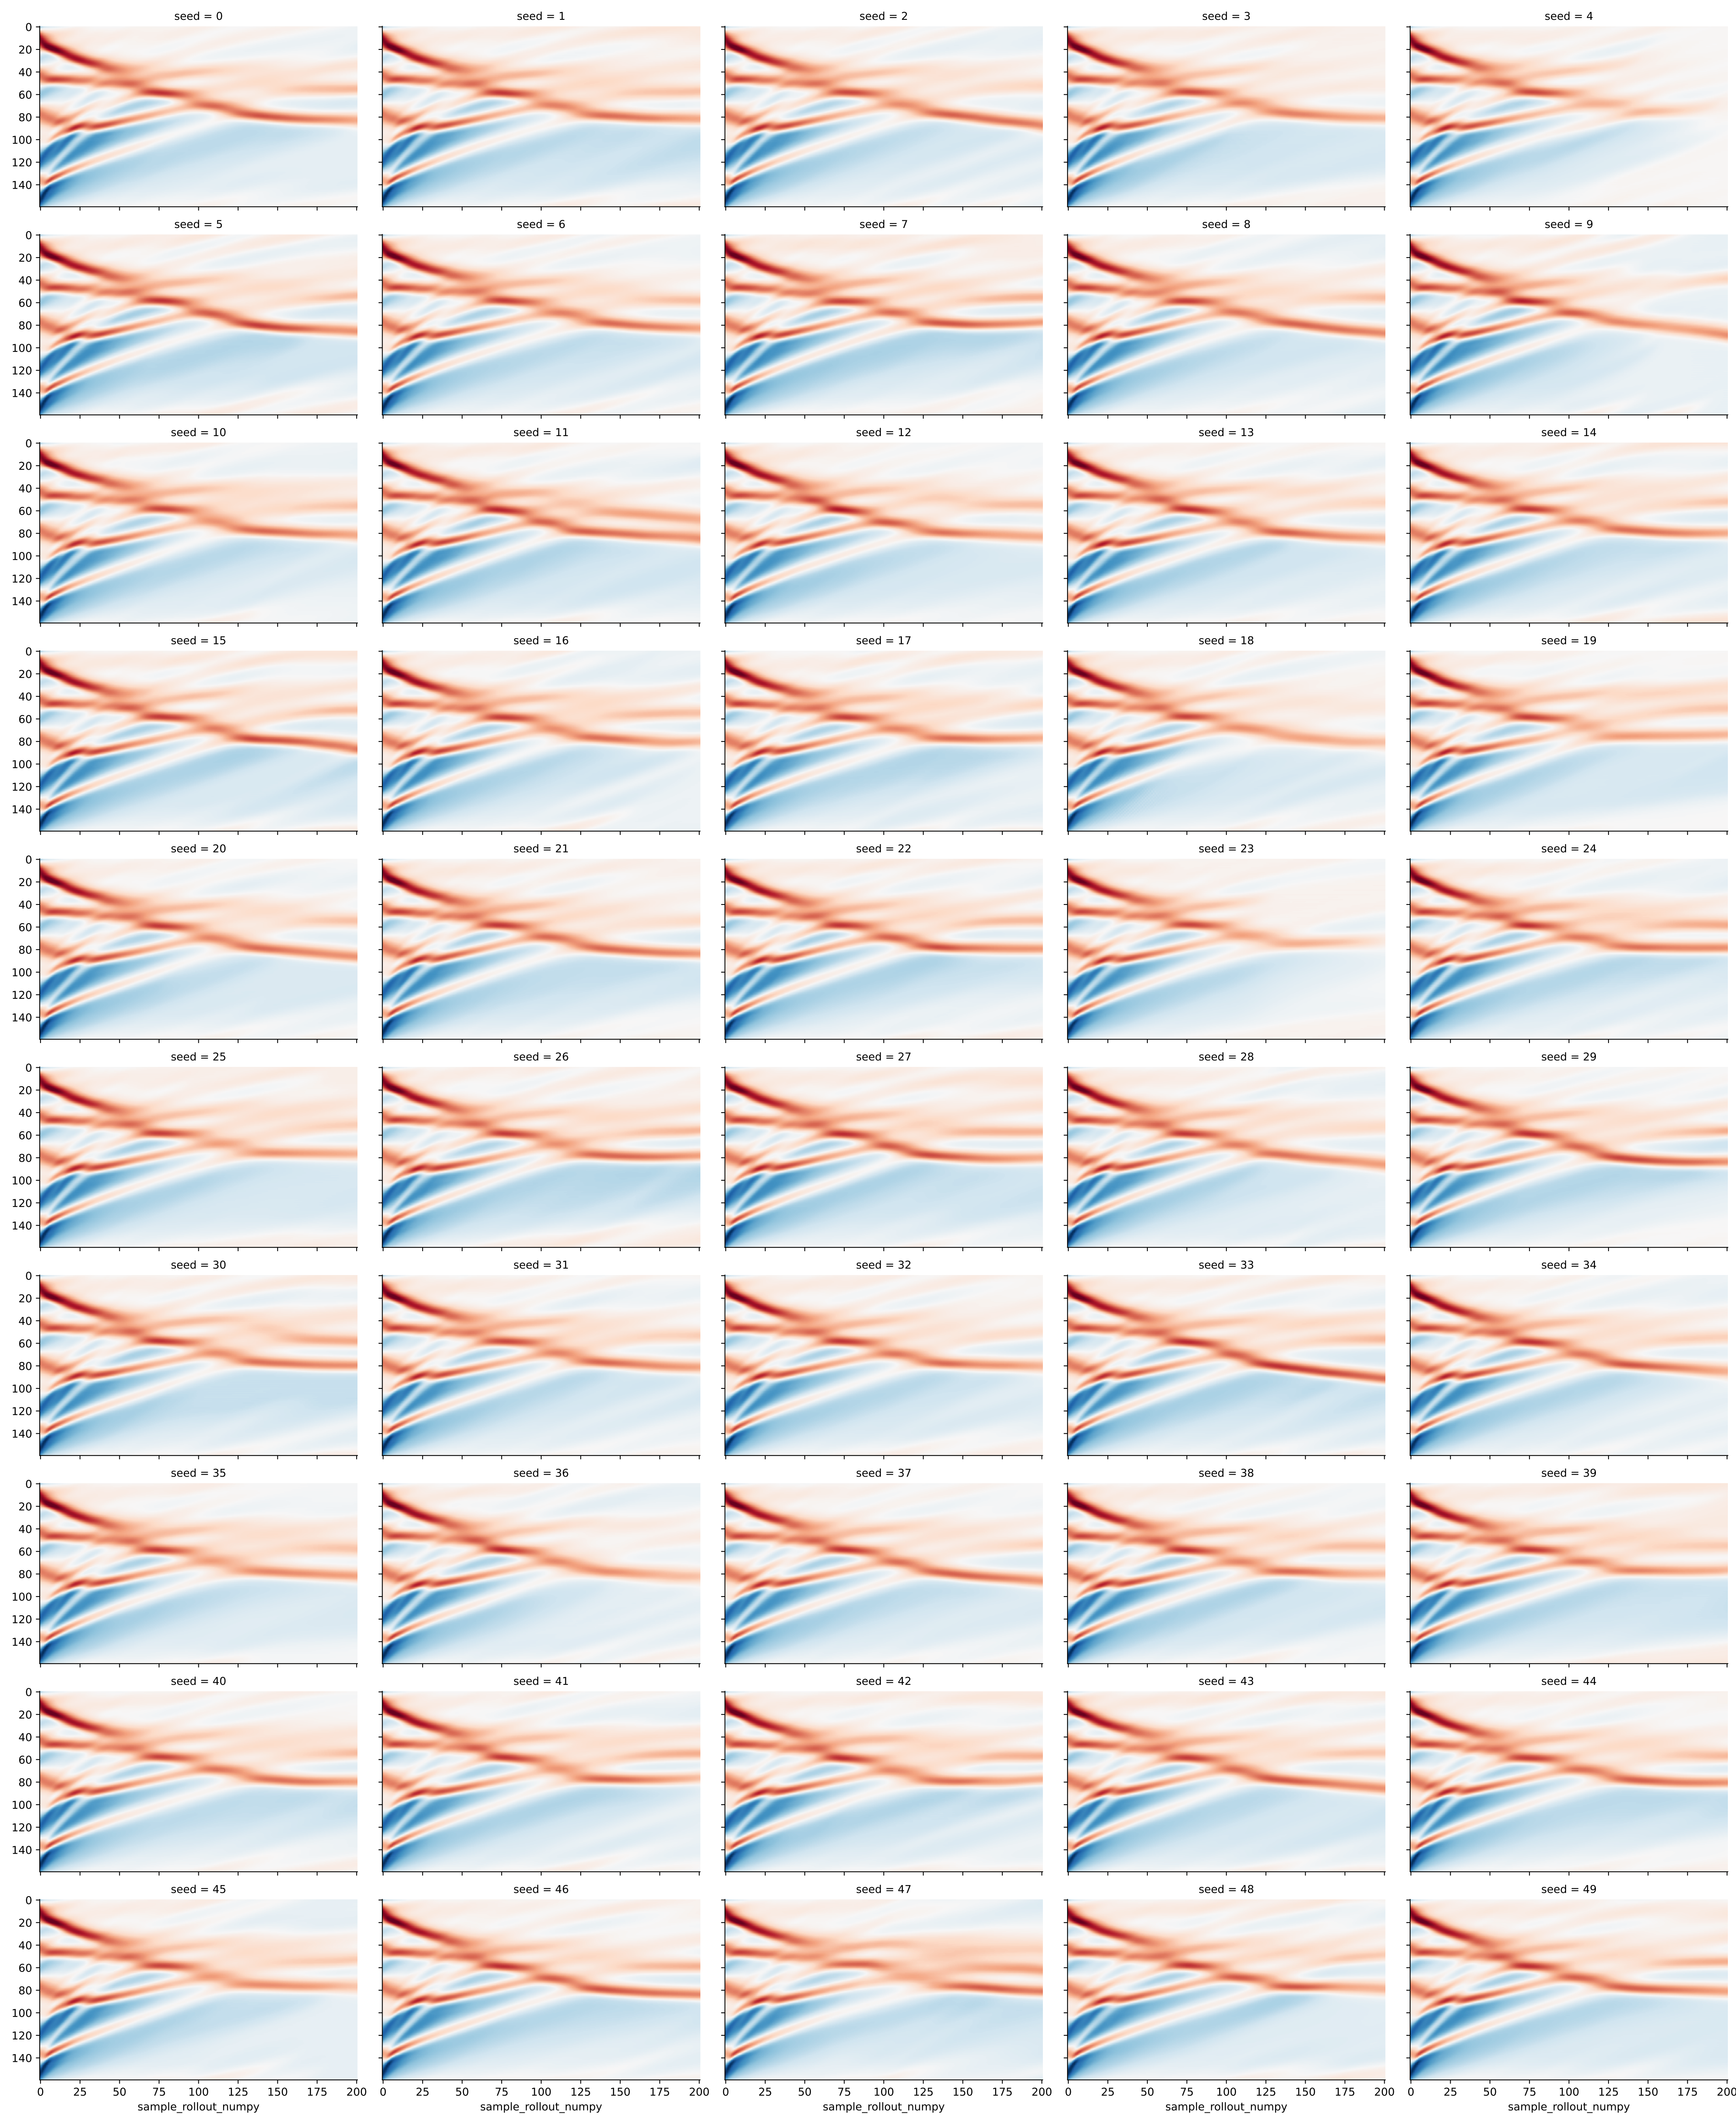

Supplement: supplementary_material [file attachment]
